# Supplementary material for: Evaluation of an Intravitreal Rho-Associated Kinase Inhibitor Depot Formulation in a Rat Model of Diabetic Retinopathy
Source: MDPI journal article supplement (doi:10.3390/pharmaceutics13081105), 2021-07-21
Supplement: s1 [file s1]

# Supplementary Materials: Evaluation of an Intravitreal Rho-Associated Kinase Inhibitor Depot Formulation in a Rat Model of Diabetic Retinopathy

Cecile Lebon, Heike Neubauer, Marianne Berdugo, Kimberley Delaunay, Elke Markert, Kolja Becker, Katja S. Baum-Kroker, Jürgen Prestle, Holger Fuchs, Remko A. Bakker and Francine Behar-Cohen

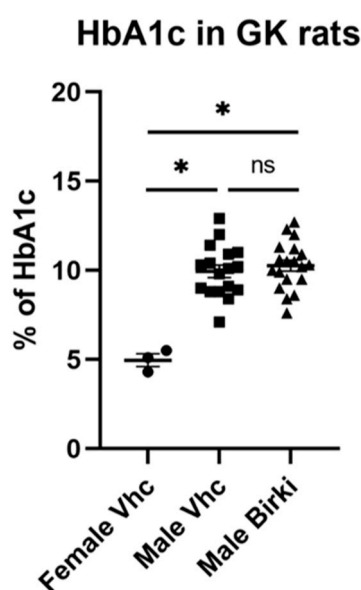

**Figure S1.** The diabetic status of every animal was defined by measurement of the plasma concentration of glycosylated hemoglobin (HbA1c). Mean of HbA1c is 4.96% for female GK rats (Average Blood Glucose: 96 mg/dL) and 9.94 and 10.26% for GK male treated with vehicle and BIRKI respectively (ABD: 239 and 248 mg/dL). Statistical significance was evaluated using the Kruskal-Wallis test, followed by the Dunn's multiple comparison post-test. \* means  $p < 0.05$
